# Supplementary material
Source: PubMed Central journal article supplement (PMC9706468)
Supplement: kiac456_supplementary_data.pdf [file kiac456_supplementary_data.pdf]

## Supplemental Data

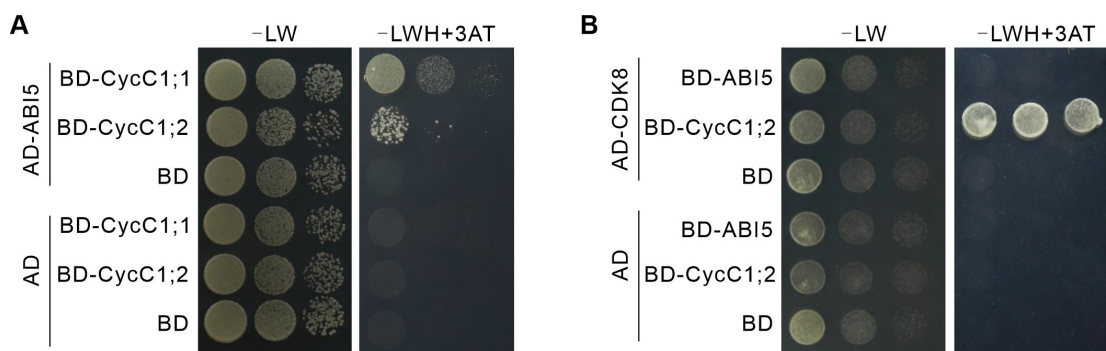

**Figure S1. The interaction of CycC1;2 with ABI5 and CDK8 with ABI5 in yeast cells.**

(A) Y2H experiment showing the interaction between ABI5 and CycC1;1 or CycC1;2 under double dropout medium (lacking Trp and Leu) and triple dropout medium (lacking Trp, Leu, His) plus 3 mM 3AT.

(B) Y2H experiment showing the interaction between CDK8 and ABI5 or CycC1;1 under double dropout medium (lacking Trp and Leu) and triple dropout medium (lacking Trp, Leu, His) plus 3 mM 3AT.

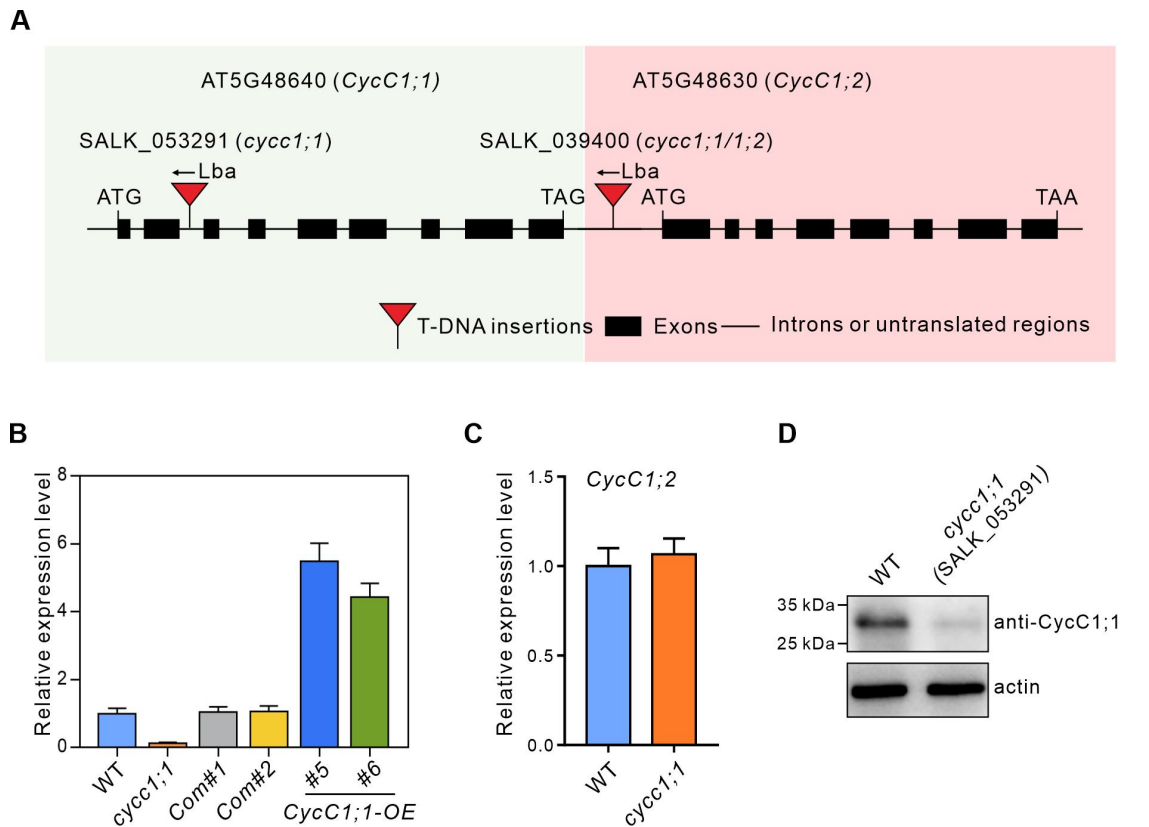

**Figure S2. *CycC1;1* suppresses abscisic acid (ABA)-inhibited seed germination through *ABI5*.**

(A) Schematic diagram showing the genomic DNA information of both *CycC1;1* and *CycC1;2*, and the T-DNA positions in *CycC1;1* and *CycC1;2*.

(B) The expression of *CycC1;1* in 7-d-old WT, *cycc1;1*, complementary lines and *CycC1;1-OE* lines assayed by RT-qPCR.

(C) The expression of *CycC1;2* in the wild-type and *cycc1;1* mutant.

(D) Immunoblot analysis reveals the specificity of anti-*CycC1;1* antibody. Total proteins were extracted from 7-d-old wild-type and *cycc1;1* mutant seedlings, and then separated on SDS-PAGE gel. The anti-*CycC1;1* and anti-actin antibodies were applied to examine the *CycC1;1* and actin proteins, respectively.

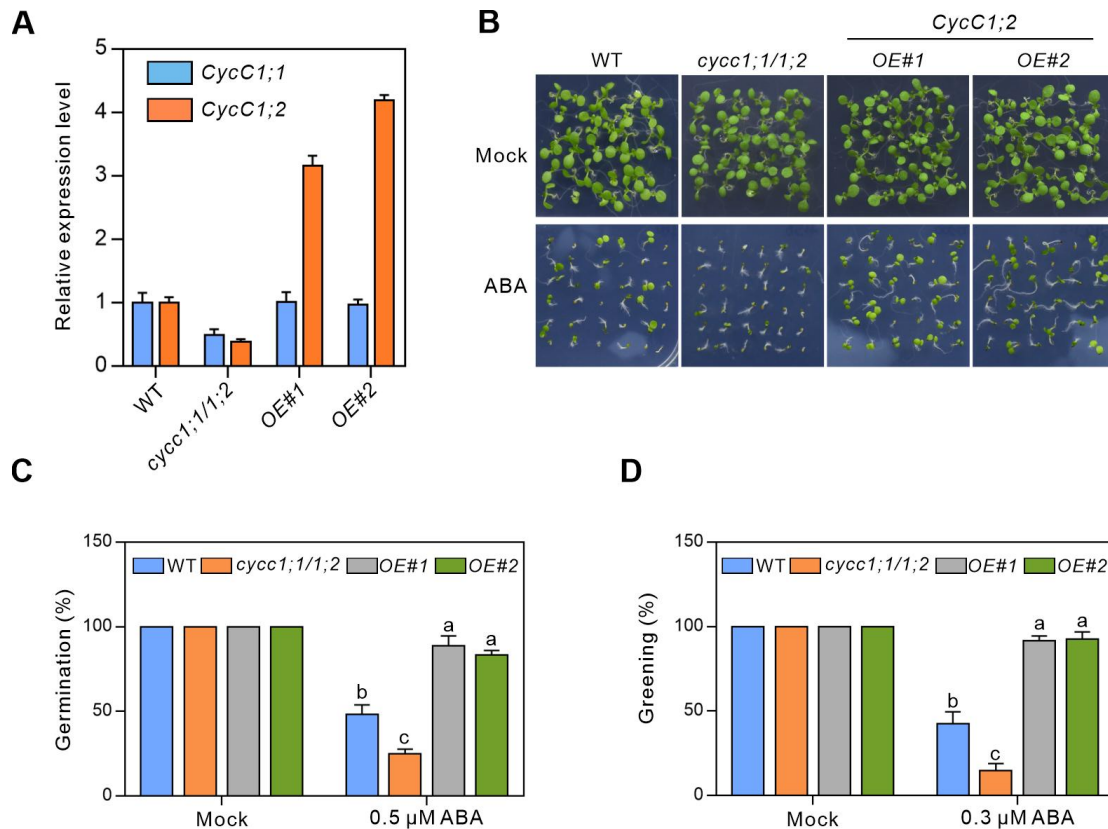

**Figure S3. Analysis of the abscisic acid (ABA) sensitivity of the *cycc1;1/1;2* mutant and *CycC1;2*-overexpression lines.**

(A) The expression of *CycC1;1* and *CycC1;2* in 7-d-old various genotypes assayed by RT-qPCR.

(B) Seedlings of 7-d-old various genotypes germinated on MS medium supplemented with or without 0.3  $\mu\text{M}$  ABA.

(C) Germination percentages of the WT, *cycc1;1/1;2* and *CycC1;2-OE* lines in response to ABA. Seed germination on MS medium without or with 0.5  $\mu\text{M}$  ABA was recorded after 3 d of stratification.

(D) Percentages of greening cotyledon of the WT, *cycc1;1/1;2* and *CycC1;2-OE* lines. Cotyledon greening was recorded 7 d after stratification on MS medium supplemented without or with 0.3  $\mu\text{M}$  ABA. Data indicate mean  $\pm$  SD (n = 3). Bars with different letters indicate significant differences at  $p < 0.05$ , revealed using ANOVA analysis.

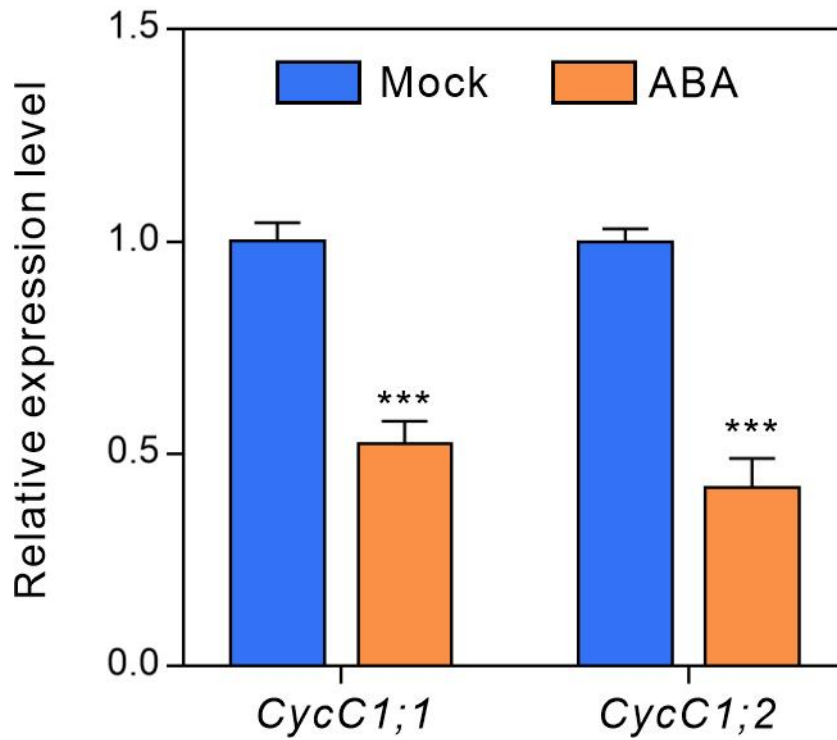

**Figure S4. Abscisic acid (ABA) represses the expression of *CycC1;1* and *CycC1;2*.**

2-d-old wild-type seeds were treated with MS medium or MS medium containing 10  $\mu$ M ABA for 24 h. Error bars indicate mean  $\pm$  SD (n = 3). Asterisks indicate significant differences using a Student's *t*-test (\*\*\*)  $p < 0.001$ .

## Supplemental Table S1. List of the primers used in this study.

List of the primers used in this study.

| Primer name                                  | Sequence (5' to 3')                           |
|----------------------------------------------|-----------------------------------------------|
| <b>Primers used for molecular cloning</b>    |                                               |
| pET28a-CycC1;1-F                             | AGCAAATGGGTCGCGGAATGTTCCCTGATTGATTTCGTTTTG    |
| pET28a-CycC1;1-R                             | CGGAGCTCGAATTCGGATATGGGTTTGTAGCAAGTTTGTG      |
| pEGAD-CycC1;1-F                              | CGAGAAGCTTGATCCATGTTCCCTGATTGATTTCGTTTTG      |
| pEGAD-CycC1;1-R                              | TATCTAGATCCGGTGGATATGGGTTTGTAGCAAGTTTGTG      |
| 1300-CycC1;2-F                               | CGGGGATCCTCTAGAGTCATGTTCCCTGATTGATTTCGTTT     |
| 1300-CycC1;2-F                               | GCCCTTGCTCACCATGTCTGGGTTTGTAGCAAGTTTGTG       |
| pSPYNE-ABI5-F                                | GGCGCGCCACTAGTGGATCCATGGTAACTAGAGAAACGAAG     |
| pSPYNE-ABI5-R                                | ACAGTACTATCGATGGATCCGAGTGGACAACCTCGGGTTC      |
| pSPYCE-CycC1;1-F                             | GGCGCGCCACTAGTGGATCCATGTTCCCTGATTGATTTCGTTTTG |
| pSPYCE-CycC1;1-R                             | ACAGTACTATCGATGGATCCTATGGGTTTGTAGCAAGTTTGT    |
| pSPYCE-CycC1;2-F                             | GGCGCGCCACTAGTGGATCCATGTTCCCTGATTGATTTCGTTT   |
| pSPYCE-CycC1;2-R                             | ACAGTACTATCGATGGATCCTTATGGGTTTGTAGCAAGTTTGT   |
| JW771-CycC1;1-F                              | GACGAGCTCGGTACCCGGATGTTCCCTGATTGATTTCGTTTTG   |
| JW771-CycC1;1-F                              | CGCGTACGAGATCTGGTCTGGGTTTGTAGCAAGTTTGTG       |
| JW771-CycC1;2-F                              | GACGAGCTCGGTACCCGGATGTTCCCTGATTGATTTCGTTT     |
| JW771-CycC1;2-F                              | CGCGTACGAGATCTGGTCTGGGTTTGTAGCAAGTTTGT        |
| JW772-ABI5-F                                 | CGGGGCGGTACCCGGATGGTAACTAGAGAAACGAAG          |
| JW772-ABI5-F                                 | AAAGCTCTGCAGGTCTTAGAGTGGACAACCTCGGGTTC        |
| pGEX4T-ABI5-FL-F                             | ATCCCCGGAATTCCCGATGGTAACTAGAGAAACGAAG         |
| pGEX4T-ABI5-FL-R                             | CGCTCGAGTCGACCCGGTTAGAGTGGACAACCTCGGGTTC      |
| pGEX4T-ABI5-371-R                            | CGCTCGAGTCGACCCGGTTATCTAGCAGCAGACTCGCGGTTC    |
| pGEX4T-ABI5-221-F                            | ATCCCCGGAATTCCCGCCACTAATCCTAAACCTAATC         |
| pGEX4T-ABI5-122-R                            | CGCTCGAGTCGACCCGGAGAACCACTAAAGACACC           |
| pGEX4T-ABI5-123-F                            | ATCCCCGGAATTCCCGAGAGGCAACGAAGATGCTAAC         |
| ABI5-pro-F                                   | ATGACCATGATTACGAATCAGAACAAAATTAGGTGTATT       |
| ABI5-pro-R                                   | GCTGCAGGTTCGACGGAAACAACCTGCATCATATACACAACAAT  |
| ABI5-gDNA-F                                  | CGACCTGCAGCCAAGCTTATGGTAACTAGAGAAACGAAGTTG    |
| ABI5-Ter-R                                   | ACGGCCAGTGCCAAGCTTCTCGAGAAGAGTGTGTTCCAC       |
| 0800-ABI5pro-F                               | TCCTGCAGCCCGGGGGATCAGAACAAAATTAGGTGTATT       |
| 0800-ABI5pro-R                               | CGCTCTAGAACTAGTGGAAACAACCTGCATCATATACACAACAA  |
| <b>Primers for site-directed mutagenesis</b> |                                               |
| ABI5-S42A-F                                  | TCTTTGGGAAGACAATCCGCTATCTACTCATTGACCCTT       |
| ABI5-S42A-R                                  | AAGGGTCAATGAGTAGATAGCGGATTGTCTTCCCAAAGA       |
| ABI5-S145A-F                                 | AGTCTTCCCTCGACAAGGCGCTTTGACACTTCCAGCTCCG      |
| ABI5-S145A-R                                 | CGGAGCTGGAAGTGTCAAAGCGCCTTGTGAGGAAGACT        |
| ABI5-T201A-F                                 | ACTGCGGCTAGACAACCGGCTTTTGGAGAGATGACACTT       |
| ABI5-T201A-R                                 | AAGTGTTCATCTCTCCAAAAGCCGGTTGTCTAGCCGCAGT      |
| ABI5-S42D-F                                  | TCTTTGGGAAGACAATCCGATATCTACTCATTGACCCTT       |

|              |                                          |
|--------------|------------------------------------------|
| ABI5-S42D-R  | AAGGGTCAATGAGTAGATATCGGATTGTCTTCCCAAAGA  |
| ABI5-S145D-F | AGTCTTCCTCGACAAGGCGATTTGACACTTCCAGCTCCG  |
| ABI5-S145D-R | CGGAGCTGGAAGTGTCAAATCGCCTTGTGCGAGGAAGACT |
| ABI5-T201D-F | ACTGCGGCTAGACAACCGGATTTTGGAGAGATGACACTT  |
| ABI5-T201D-R | AAGTGTCATCTCTCCAAAATCCGGTTGTCTAGCCGCAGT  |

#### Primers for ChIP assays

|                |                            |
|----------------|----------------------------|
| ABI5-500bp-F   | GACGGATATAATGATGACCCAAGC   |
| ABI5-500bp-R   | CTCTTCCAATAAAGTTTTTCGTTACC |
| ABI5-TATAbox-F | CAGGGACAAGTAACTGAAGTTTGG   |
| ABI5-TATAbox-R | GTCAACTTCGTTTCTCTAGTTACCAT |
| ABI5-CDS-F     | GAGATGACACTTGAGGATTTCTTG   |
| ABI5-CDS-R     | CTCCTCCTGTCTTTTAGCATAAC    |
| ABI5-Ter-F     | GACAGAACGAGGGAAAAACTGATG   |
| ABI5-Ter-R     | CCAAAGATTGATGATGTTGAAACAC  |
| ACTIN7-F       | CGTTTCGCTTTCCTTAGTGTTA     |
| ACTIN7-R       | AGCGAACGGATCTAGAGACTC      |

#### Primers used for genotypic analysis

|                |                        |
|----------------|------------------------|
| SALK_053291-LP | AGAACCGTTGTCGTCGATATG  |
| SALK_053291-RP | TGCCAATTTCTGGAATTCATC  |
| SALK_039400-LP | TAATGTGTTGTGCCAGTTTCG  |
| SALK_039400-RP | CTATTTCCGTGTTTCAGGGG   |
| LBa1           | TGGTTCACGTAGTGGGCCATCG |

#### Primers used for RT-qPCR

|           |                           |
|-----------|---------------------------|
| CYCC1;1-F | ATCTGGTTGTGTTTCACCCTTA    |
| CYCC1;1-R | ACAATTCCCCATGTAATCTGGT    |
| CYCC1;2-F | CTCCTACATGCTTGTATTTGGC    |
| CYCC1;2-R | GTCATTGATTCCAGAATCCTGC    |
| RD29A-F   | GCCGACGGGATTTGACG         |
| RD29A R   | GCCGGAAATTTATCCTCTTCTGA   |
| EM1-F     | CGAGGAAGGAGCAGTTAG        |
| EM1-R     | GTAAGTGTCTCCTTTTACG       |
| EM6-F     | TGAGAGGGCAAAGAAGGG        |
| EM6-R     | CTTGTCTCCGGTGCTAAG        |
| ABI5-F    | AAGCCACCGGTTTTTAGACACACAG |
| ABI5-R    | CACCTCCTCCATTATGTCTCGCTTG |
| ACTIN2-F  | GGTAACATTGTGCTCAGTGGTGG   |
| ACTIN2-R  | AACGACCTTAATCTTCATGCTGC   |

---
